# Supplementary material
Source: Research Square preprint supplement (doi:10.21203/rs.3.rs-9812976/v1)
Supplement: Supplementary file 1 [file 12ea9eb3f2679254e685e498.docx]

**Genomic characteristics of a potentially novel phosphate-solubilizing *Phyllobacterium* sp. YNK-FB0058 with plant growth-promoting functions**

**Yu Wang1,2, Jianpeng Jia1,2†, Te Pu2, Zhufeng Shi2, Zilin Li3, Ming Ni2, Yongqin Liao3, You Luo3, Xiao Yao3, Xun He3, Runrun Du3, Xin He3, Jing Li3, Xuewei Li3* and Peiwen Yang1,2***

**Table S1.** ANI and dDDH values between the genome of strain YNK-FB0058 and reference genomes of the type strains.

| Reference genome | Accession number | ANI/% | dDDH/% |
| --- | --- | --- | --- |
| *Aminobacter aminovorans* | GCF_900445235.1 | 73.3 | 19.3 |
| *DUSC01 sp* 016756615 | GCF_016756615.1 | 73.32 | 19.5 |
| *Allorhizobium sp* 014237835 | GCF_014237835.1 | 71.91 | 19.2 |
| *Aurantimonas endophytica* | GCF_014196845.1 | 71.96 | 18.7 |
| *Pseudaminobacter camelthorni* | GCF_011045125.1 | 73.43 | 18.8 |
| *Ochrobactrum tritici* | GCF_008932295.1 | 72.7 | 19.8 |
| *Mesorhizobium sp* 003952385 | GCF_003952385.1 | 73.76 | 19.5 |
| *Mesorhizobium G denitrificans* | GCF_003403035.1 | 71.42 | 18.8 |
| *Phyllobacterium bourgognense* | GCF_003337575.1 | 76.45 | 19.8 |
| *Phyllobacterium sophorae* | GCF_003010965.1 | 76.3 | 19.8 |
| *Phyllobacterium brassicacearum* | GCF_003010955.1 | 76.44 | 19.9 |
| *Phyllobacterium zundukense* | GCF_002764115.1 | 77.05 | 20.1 |
| *Ochrobactrum A quorumnocens* | GCF_002278035.1 | 71.8 | 21.4 |
| *Mesorhizobium sp* 000502715 | GCF_000502715.1 | 73.47 | 19.3 |
| *Phyllobacterium sp* 000282595 | *GCF_000282595.1* | 73.47 | 18.9 |
| *Mesorhizobium_kowhaii* | *GCF_003253745.1* | 73.49 | 19.5 |

**Table S2.** Phosphate solubilization related genes

| Gene ID | Gene name | KO ID | Chromosome location | Gene Description | Gene Description |
| --- | --- | --- | --- | --- | --- |
| gene0471 | *gcd* | K00117 | 495069-497405 | MULTISPECIES: glucose/quinate/shikimate family membrane-bound PQQ-dependent dehydrogenase | MULTISPECIES: glucose/quinate/shikimate family membrane-bound PQQ-dependent dehydrogenase |
| gene2832 | *ppa* | K01507 | 2910011-2910553 | MULTISPECIES: inorganic diphosphatase |  |
| gene1456 | *ppx-gppA* | K01524 | 1489345-1490853 | MULTISPECIES: exopolyphosphatase |  |
| gene0609 | *phnG* | K06166 | 639855-640331 | MULTISPECIES: phosphonate C-P lyase system protein PhnG |  |
| gene0610 | *phnH* | K06165 | 640332-640943 | MULTISPECIES: phosphonate C-P lyase system protein PhnH |  |
| gene0611 | *phnI* | K06164 | 640947-642056 | MULTISPECIES: carbon-phosphorus lyase complex subunit PhnI |  |
| gene0612 | *phnJ* | K06163 | 642053-642931 | MULTISPECIES: alpha-D-ribose 1-methylphosphonate 5-phosphate C-P-lyase PhnJ |  |
| gene0614 | *phnL* | K05780 | 643714-644427 | MULTISPECIES: phosphonate C-P lyase system protein PhnL |  |
| gene0621 | *phnM* | K06162 | 650089-651225 | MULTISPECIES: alpha-D-ribose 1-methylphosphonate 5-triphosphate diphosphatase |  |
| gene0622 | *phnN* | K05774 | 651225-651842 | MULTISPECIES: phosphonate metabolism protein/1,5-bisphosphokinase (PRPP-forming) PhnN |  |
| gene1060 | *phnP* | K06167 | 1098763-1099572 | MULTISPECIES: MBL fold metallo-hydrolase |  |
| gene3033 | *phoU* | K02039 | 3113524-3114255 | phosphate signaling complex protein PhoU |  |
| gene2315 | *phoH* | K06217 | 2338234-2339250 | MULTISPECIES: PhoH family protein |  |
| gene0968 | *glpQ* | K01126 | 1004483-1005199 | MULTISPECIES: glycerophosphodiester phosphodiesterase |  |
| gene0608 | *phnF* | K02043 | 639021-639764 | MULTISPECIES: phosphonate metabolism transcriptional regulator PhnF |  |
| gene0613 | *phnK* | K05781 | 642928-643704 | MULTISPECIES: phosphonate C-P lyase system protein PhnK |  |
| gene0616 | *phnC* | K02041 | 645136-645969 | MULTISPECIES: phosphonate ABC transporter ATP-binding protein |  |
| gene0617 | *phnD* | K02044 | 646036-646950 | MULTISPECIES: phosphonate ABC transporter substrate-binding protein |  |
| gene0618 | *phnE* | K02042 | 647020-647988 | MULTISPECIES: phosphonate ABC transporter, permease protein PhnE |  |
| gene3031 | *pstA* | K02038 | 3111350-3112666 | MULTISPECIES: phosphate ABC transporter permease PstA |  |
| gene3032 | *pstB* | K02036 | 3112685-3113506 | phosphate ABC transporter ATP-binding protein |  |
| gene3030 | *pstC* | K02037 | 3109887-3111353 | phosphate ABC transporter permease subunit PstC |  |
| gene0729 | *pstS* | K02040 | 766808-767911 | MULTISPECIES: phosphate ABC transporter substrate-binding protein PstS |  |
| gene0394 | *ugpA* | K05814 | 409256-410146 | MULTISPECIES: sn-glycerol-3-phosphate ABC transporter permease UgpA |  |
| gene0395 | *ugpB* | K05813 | 410220-411530 | MULTISPECIES: sn-glycerol-3-phosphate ABC transporter substrate-binding protein UgpB |  |
| gene0393 | *ugpE* | K05815 | 408398-409246 | MULTISPECIES: sn-glycerol-3-phosphate ABC transporter permease UgpE |  |
| gene0392 | *ugpC* | K05816 | 407318-408394 | MULTISPECIES: sn-glycerol-3-phosphate ABC transporter ATP-binding protein UgpC |  |
| gene2198 | *phoR* | K07636 | 2209560-2210819 | MULTISPECIES: ATP-binding protein |  |
| gene3360 | *pqqB* | K06136 | 141375-142316 | MULTISPECIES: pyrroloquinoline quinone biosynthesis protein PqqB |  |
| gene3359 | *pqqC* | K06137 | 140623-141378 | MULTISPECIES: pyrroloquinoline-quinone synthase PqqC |  |
| gene3358 | *pqqD* | K06138 | 140327-140626 | MULTISPECIES: pyrroloquinoline quinone biosynthesis peptide chaperone PqqD |  |
| gene3357 | *pqqE* | K06139 | 139221-140330 | MULTISPECIES: pyrroloquinoline quinone biosynthesis protein PqqE |  |
| gene3547 | *TC.PIT* | K03306 | 345264-346265 | MULTISPECIES: inorganic phosphate transporter |  |

**Table S3.** Nitrogen cycle related genes.

| Gene ID | Gene name | KO ID | Psition | Gene Description |
| --- | --- | --- | --- | --- |
| gene1138 | *iscU* | K04488 | 1179783-1180226 | MULTISPECIES: iron-sulfur cluster assembly scaffold protein |
| gene0151 | *glnA* | K01915 | 157147-158517 | MULTISPECIES: glutamine synthetase family protein |
| gene1131 | *glnB* | K04751 | 1173230-1173568 | MULTISPECIES: P-II family nitrogen regulator |
| gene0833 | *cynT* | K01673 | 849908-850564 | carbonic anhydrase |
| gene2215 | *npd* | K00459 | 2236147-2237109 | MULTISPECIES: nitronate monooxygenase family protein |

| Gene ID | Gene name | KO ID | Psition | Gene Description |
| --- | --- | --- | --- | --- |
| gene0161 | *zur* | K09823 | 169124-169522 | MULTISPECIES: Fur family transcriptional regulator |

**Table S4.** Zinc solubilization related genes.

**Table S5.** Iron carrier production related genes.

| Gene ID | Gene name | KO ID | Psition | Gene Description |
| --- | --- | --- | --- | --- |
| gene1386 | *dhbF* | K04780 | 1421927-1425922 | MULTISPECIES: amino acid adenylation domain-containing protein |
| gene3552 | *efeB* | K16301 | 349878-351179 | MULTISPECIES: iron uptake transporter deferrochelatase/peroxidase subunit |
| gene3554 | *efeU* | K07243 | 352373-353215 | MULTISPECIES: iron uptake transporter permease EfeU |
| gene3551 | *efeO* | K07224 | 349041-349868 | MULTISPECIES: iron uptake system protein EfeO |
| gene2979 | *ftrA* | K13633 | 3064390-3065025 | DJ-1/PfpI family protein |
| gene3628 | *fepD* | K23186 | 436976-438010 | iron chelate uptake ABC transporter family permease subunit |
| gene3627 | *fepG* | K23187 | 435918-436979 | MULTISPECIES: iron chelate uptake ABC transporter family permease subunit |
| gene3626 | *fepC* | K23188 | 435106-435921 | MULTISPECIES: ABC transporter ATP-binding protein |
| gene0381 | *afuA* | K02012 | 393056-394084 | MULTISPECIES: ABC transporter substrate-binding protein |
| gene0382 | *afuB* | K02011 | 394156-396384 | iron ABC transporter permease |
| gene0383 | *afuC* | K02010 | 396381-397442 | MULTISPECIES: ABC transporter ATP-binding protein |
| gene2432 | *furB* | K03711 | 2472224-2472661 | MULTISPECIES: Fur family transcriptional regulator |

**Table S6.** Indole acetic acid (IAA) secretion related genes.

| Gene ID | Gene name | KO ID | Psition | Gene Description |
| --- | --- | --- | --- | --- |
| gene0655 | *aroF* | K01626 | 682058-683437 | MULTISPECIES: 3-deoxy-7-phosphoheptulonate synthase class II |
| gene3151 | *aroB* | K01735 | 3226853-3227977 | MULTISPECIES: 3-dehydroquinate synthase |
| gene4412 | *aroQ* | K03786 | 1365903-1366346 | MULTISPECIES: type II 3-dehydroquinate dehydratase |
| gene2723 | *aroE* | K00014 | 2804098-2804940 | shikimate dehydrogenase |
| gene3691 | *quiA* | K05358 | 508518-510902 | MULTISPECIES: membrane-bound PQQ-dependent dehydrogenase, glucose/quinate/shikimate family |
| gene3150 | *aroK* | K00891 | 3226183-3226866 | MULTISPECIES: shikimate kinase |
| gene2632 | *aroA* | K00800 | 2693043-2694398 | MULTISPECIES:3-phosphoshikimate 1-carboxyvinyltransferase |
| gene1800 | *aroC* | K01736 | 1840224-1841318 | MULTISPECIES: chorismate synthase |
| gene0249 | *trpEG* | K13503 | 256314-258497 | MULTISPECIES: anthranilate synthase |
| gene0998 | *trpD* | K00766 | 1036190-1037209 | MULTISPECIES: anthranilate phosphoribosyltransferase |
| Gene2714 | *trpF* | K01817 | 2797901-2798557 | phosphoribosylanthranilate isomerase |
| Gene0997 | *trpC* | K01609 | 1035388-1036188 | MULTISPECIES: indole-3-glycerol phosphate synthase TrpC |
| Gene2713 | *trpB* | K01696 | 2796635-2797885 | tryptophan synthase subunit beta |
| Gene2844 | *tyrA1* | K04092 | 2922062-2922370 | MULTISPECIES: chorismate mutase |
| Gene2261 | *pheA2* | K04518 | 2282117-2282980 | MULTISPECIES: prephenate dehydratase |
| Gene3166 | *hisC* | K00817 | 1631404-1632507 | MULTISPECIES:pyridoxal phosphate-dependent aminotransferase |
| Gene3167 | *tyrC* | K00220 | 3241288-3242214 | MULTISPECIES: prephenate/arogenate dehydrogenase family protein |
| Gene2174 | *aspB* | K00812 | 76261-77430 | MULTISPECIES: pyridoxal phosphate-dependent aminotransferase |
